# Supplementary material for: The expression pattern of small nucleolar and small Cajal body-specific RNAs characterizes distinct molecular subtypes of multiple myeloma
Source: PubMed Central journal article supplement — Blood Cancer J. 2012 Nov 23;2(11):e96–. doi: 10.1038/bcj.2012.41 (PMC3511933; doi:10.1038/bcj.2012.41), 2012-11-23
Supplement: bcj201241x3.pdf [file bcj201241x3.pdf]

**Figure S1.** Correlation plot of sno/scaRNAs expression levels (red bar, right scale) and corresponding inferred CN (point, left scale). For each sno/scaRNA localization and Kendall corrected p-value are reported.

**Figure S2.** SCARNA22 and MMSET expression levels in the cohort of 55 MMs and 8 sPCLs (A) and in 18 Human MM cell lines (B).
