# Supplementary material for: The expression pattern of small nucleolar and small Cajal body-specific RNAs characterizes distinct molecular subtypes of multiple myeloma
Source: PubMed Central journal article supplement — Blood Cancer J. 2012 Nov 23;2(11):e96–. doi: 10.1038/bcj.2012.41 (PMC3511933; doi:10.1038/bcj.2012.41), 2012-11-23
Supplement: bcj201241x4.pdf [file bcj201241x4.pdf]

**Supplemental table 1. Demographic, clinic and biomolecular data concerning all the investigated patients.**

| Sample name | Sex | Age at diagnosis (years) | Stage* | Monoclonal component | TC <sup>§</sup> | HD <sup>¶</sup> | del(13) <sup>‡</sup> | del(17p) <sup>‡</sup> | +1q <sup>‡</sup> |
|-------------|-----|--------------------------|--------|----------------------|-----------------|-----------------|----------------------|-----------------------|------------------|
| MM-015      | M   | 70                       | II A   | Gk                   | 1               | -               | +                    | -                     | -                |
| MM-026      | F   | 73                       | IIIB   | k                    | 1               | nd              | -                    | -                     | -                |
| MM-031      | M   | 57                       | IIIA   | Ak                   | 1               | +               | -                    | -                     | +                |
| MM-052      | F   | 39                       | IA     | Gλ + Aλ              | 1               | -               | +                    | -                     | +                |
| MM-055      | F   | 69                       | IIIA   | Gk                   | 1               | -               | -                    | -                     | -                |
| MM-111      | M   | 73                       | IA     | Gλ                   | 1               | -               | -                    | -                     | -                |
| MM-115      | F   | 53                       | IIIA   | k                    | 1               | -               | +                    | -                     | +                |
| MM-126      | M   | 62                       | IIA    | Ak                   | 1               | nd              | -                    | nd                    | nd               |
| MM-140      | M   | 61                       | IIIB   | nd                   | 1               | -               | -                    | -                     | -                |
| MM-179      | M   | 50                       | IIIA   | Gλ                   | 1               | +               | -                    | +                     | -                |
| MM-212      | F   | 55                       | IIIA   | nd                   | 1               | -               | -                    | -                     | -                |
| MM-246      | M   | nd                       | nd     | nd                   | 1               | -               | -                    | -                     | -                |
| MM-030      | M   | 69                       | IIIA   | Gλ                   | 2               | +               | -                    | -                     | -                |
| MM-034      | M   | 72                       | IA     | Gk                   | 2               | +               | -                    | -                     | -                |
| MM-035      | M   | 74                       | IA     | Gk                   | 2               | nd              | -                    | -                     | -                |
| MM-038      | F   | 67                       | IIA    | k                    | 2               | +               | +                    | -                     | -                |
| MM-039      | M   | 49                       | IIA    | Gλ                   | 2               | +               | -                    | -                     | -                |
| MM-043      | F   | 73                       | IA     | Gk + Gλ              | 2               | -               | -                    | -                     | +                |
| MM-049      | M   | 63                       | IIIB   | k                    | 2               | +               | -                    | -                     | -                |
| MM-056      | M   | 72                       | IA     | Gk                   | 2               | nd              | -                    | -                     | nd               |
| MM-079      | F   | 74                       | IIA    | Gk + Gλ              | 2               | +               | -                    | -                     | -                |
| MM-131      | M   | 69                       | IA     | Gk                   | 2               | +               | -                    | -                     | -                |
| MM-143      | M   | 56                       | IIA    | Gk                   | 2               | +               | -                    | -                     | -                |
| MM-151      | F   | 72                       | IA     | Gλ                   | 2               | +               | -                    | -                     | -                |
| MM-243      | F   | 68                       | nd     | nd                   | 2               | +               | -                    | -                     | +                |
| MM-016      | M   | 66                       | IIIB   | Gk                   | 3               | +               | -                    | -                     | +                |
| MM-027      | M   | 61                       | IA     | Gk                   | 3               | +               | +                    | -                     | +                |
| MM-036      | M   | 66                       | IIA    | Gk                   | 3               | -               | +                    | -                     | +                |
| MM-040      | F   | 77                       | IIIB   | Gλ                   | 3               | +               | +                    | -                     | +                |
| MM-050      | M   | 71                       | IA     | Aλ                   | 3               | nd              | -                    | -                     | nd               |
| MM-081      | M   | 79                       | IA     | Ak                   | 3               | nd              | nd                   | nd                    | nd               |
| MM-094      | M   | nd                       | IA     | Aλ                   | 3               | -               | +                    | -                     | +                |
| MM-177      | M   | 73                       | IIIA   | Gk                   | 3               | -               | +                    | -                     | +                |
| MM-229      | M   | 75                       | IIA    | Gk                   | 3               | -               | -                    | -                     | -                |
| MM-239      | F   | 72                       | nd     | A                    | 3               | +               | +                    | -                     | -                |
| MM-253      | F   | 46                       | nd     | λ                    | 3               | +               | +                    | -                     | +                |
| MM-295      | F   | 74                       | nd     | λ                    | 3               | nd              | +                    | -                     | nd               |
| MM-021      | M   | 52                       | nd     | nd                   | 4               | -               | +                    | +                     | +                |
| MM-042      | M   | 54                       | IIIA   | Aλ                   | 4               | +               | +                    | -                     | +                |
| MM-066      | F   | 78                       | IIIA   | Ak                   | 4               | -               | -                    | -                     | -                |
| MM-074      | M   | 69                       | IIIA   | Ak                   | 4               | +               | +                    | -                     | +                |
| MM-083      | M   | 72                       | IA     | Gλ                   | 4               | -               | +                    | -                     | +                |
| MM-087      | F   | 85                       | IIIA   | Gλ                   | 4               | -               | +                    | -                     | +                |
| MM-104      | F   | 63                       | IIIA   | Aλ                   | 4               | -               | +                    | -                     | +                |
| MM-123      | M   | 56                       | IIIA   | Gk                   | 4               | -               | +                    | -                     | +                |
| MM-195      | M   | 63                       | nd     | Gk                   | 4               | -               | +                    | -                     | -                |
| MM-206      | F   | 73                       | IA     | Gk                   | 4               | -               | +                    | -                     | - <sup>‡</sup>   |
| MM-208      | M   | 75                       | nd     | Aλ                   | 4               | +               | -                    | -                     | -                |
| MM-233      | M   | 75                       | IIIA   | Gλ                   | 4               | -               | +                    | -                     | +                |
| MM-004      | F   | 58                       | IA     | Gk                   | 5               | nd              | -                    | nd                    | nd               |
| MM-025      | F   | 64                       | IA     | Gλ                   | 5               | -               | +                    | -                     | +                |
| MM-069      | M   | 66                       | IIA    | Gk                   | 5               | -               | +                    | -                     | +                |
| MM-154      | F   | 71                       | IIA    | G                    | 5               | -               | +                    | -                     | +                |
| MM-224      | F   | 53                       | IIIA   | Gk                   | 5               | -               | -                    | -                     | +                |
| MM-335      | F   | 68                       | nd     | nd                   | 5               | -               | +                    | -                     | +                |
| PCL-005     | M   | 76                       | PCL    | Ak                   |                 | +               | -                    | -                     | +                |
| PCL-006     | M   | 55                       | PCL    | Gk                   |                 | nd              | -                    | +                     | nd               |
| PCL-007     | M   | 66                       | PCL    | k                    |                 | nd              | nd                   | +                     | +                |
| PCL-009     | F   | 78                       | PCL    | nd                   |                 | -               | +                    | -                     | +                |
| PCL-011     | M   | 76                       | PCL    | Gk                   |                 | -               | +                    | +                     | +                |
| PCL-013     | M   | 76                       | PCL    | Aλ                   |                 | -               | -                    | -                     | +                |
| PCL-031     | F   | nd                       | PCL    | nd                   |                 | nd              | -                    | +                     | nd               |
| PCL-033     | F   | 75                       | PCL    | λ                    |                 | nd              | +                    | -                     | nd               |

\*The Durie clinical staging system was adopted. <sup>§</sup>The TC (translocation/cyclin D expression) group according to Hideshima classification is indicated. <sup>¶</sup>HD = presence of the hyperdiploid status on the basis of FISH evaluation criteria. <sup>‡</sup>del(13), del(17), 1q gain/amplification were determined by FISH and/or microarray genome-wide analysis. <sup>‡</sup>FISH revealed multiple copies of the *BCL9* locus (1q21.1), and two copies of the *ARF9* locus (1q42.13)<sup>§</sup>, so the patient was not considered in the supervised analysis regarding 1q gain.
