# Supplementary material for: The expression pattern of small nucleolar and small Cajal body-specific RNAs characterizes distinct molecular subtypes of multiple myeloma
Source: PubMed Central journal article supplement — Blood Cancer J. 2012 Nov 23;2(11):e96–. doi: 10.1038/bcj.2012.41 (PMC3511933; doi:10.1038/bcj.2012.41), 2012-11-23
Supplement: bcj201241x5.pdf [file bcj201241x5.pdf]

**Supplemental table 2. Multiclass analysis of 55 MMs stratified in 5 TC groups.**

| <b>snoRNA</b> | <b>alias</b> | <b>cytoband</b> | <b>Score(d)</b> | <b>TC1</b> | <b>TC2</b> | <b>TC3</b> | <b>TC4</b> | <b>TC5</b> |
|---------------|--------------|-----------------|-----------------|------------|------------|------------|------------|------------|
| SCARNA22      | ACA11        | 4p16            | <b>0.43</b>     | -1.86      | -2.19      | -1.29      | 6.59       | -2.15      |
| SNORD115-32   | HBII-52-32   | 15q11           | <b>0.18</b>     | -1.78      | 1.82       | -0.15      | 0.80       | -1.67      |
| SNORD115-25   | HBII-52-25   | 15q11           | <b>0.17</b>     | -1.62      | 1.89       | -0.11      | 0.29       | -1.23      |
| SNORD115-31   | HBII-52-31   | 15q11           | <b>0.17</b>     | -1.69      | 1.76       | -0.31      | 0.68       | -1.16      |
| SNORD115-7    | HBII-52-7    | 15q11           | <b>0.17</b>     | -1.67      | 1.97       | -0.29      | 0.54       | -1.42      |
| SNORD116-29   | HBII-85-29   | 15q11           | <b>0.16</b>     | -0.68      | 2.21       | -1.03      | -0.27      | -0.82      |
| SNORD8        | mgU6-53      | 14q11           | <b>0.15</b>     | 1.08       | 1.25       | -0.27      | -1.83      | -0.64      |
| SNORA74A      | U19          | 5q31            | <b>0.15</b>     | -1.61      | 1.22       | 1.10       | -0.65      | -0.33      |
| SNORD116-23   | HBII-85-23   | 15q11           | <b>0.15</b>     | -0.51      | 1.77       | -1.41      | 0.34       | -0.67      |
| SNORD24       | U24          | 9q34            | <b>0.14</b>     | -1.07      | 1.58       | 0.98       | -1.20      | -0.84      |
| SNORD115-24   | HBII-52-24   | 15q11           | <b>0.14</b>     | -1.44      | 1.60       | -0.13      | 0.24       | -0.81      |
| SNORD116-25   | HBII-85-25   | 15q11           | <b>0.14</b>     | -0.47      | 1.97       | -1.11      | -0.30      | -0.52      |
| SNORD36C      | U36C         | 9q34            | <b>0.14</b>     | -1.29      | 1.53       | 0.78       | -0.88      | -0.53      |
| SNORD116-22   | HBII-85-22   | 15q11           | <b>0.13</b>     | -0.80      | 1.53       | -0.92      | 0.48       | -0.84      |
| SNORD101      | U101         | 6q23            | <b>0.13</b>     | -0.85      | -1.08      | 0.72       | 1.50       | -0.40      |
