# Supplementary material for: The expression pattern of small nucleolar and small Cajal body-specific RNAs characterizes distinct molecular subtypes of multiple myeloma
Source: PubMed Central journal article supplement — Blood Cancer J. 2012 Nov 23;2(11):e96–. doi: 10.1038/bcj.2012.41 (PMC3511933; doi:10.1038/bcj.2012.41), 2012-11-23
Supplement: bcj201241x6.pdf [file bcj201241x6.pdf]

**Supplemental table 3. Supervised analysis comparing HD versus not-HD MM samples.**

| <b>snoRNA</b> | <b>alias</b> | <b>cytoband</b> | <b>Score(d)</b> | <b>Fold Change</b> |
|---------------|--------------|-----------------|-----------------|--------------------|
| SNORA74A      | U19          | 5q31            | 4.88            | 3.48               |
| SNORA68       | U68          | 19p13           | 4.73            | 2.29               |
| SNORD24       | U24          | 9q34            | 4.67            | 1.81               |
| SNORA23       | ACA23        | 11p15           | 3.86            | 2.23               |
| SNORA22       | ACA22        | 7q11            | 3.83            | 2.10               |
| SNORD36B      | U36B         | 9q34            | 3.47            | 1.81               |
| SNORD95       | U95          | 5q35            | 3.44            | 1.55               |
| SNORD63       | U63          | 5q31            | 3.39            | 1.58               |
| SNORA64       | U64          | 16p13           | 3.38            | 2.05               |
| SNORD36C      | U36C         | 9q34            | 3.32            | 1.71               |
| SNORA40       | ACA40        | 11q21           | 3.31            | 1.88               |
| SNORA70D      | U70D         | 16q22           | -4.13           | 0.59               |
