# Supplementary material for: The expression pattern of small nucleolar and small Cajal body-specific RNAs characterizes distinct molecular subtypes of multiple myeloma
Source: PubMed Central journal article supplement — Blood Cancer J. 2012 Nov 23;2(11):e96–. doi: 10.1038/bcj.2012.41 (PMC3511933; doi:10.1038/bcj.2012.41), 2012-11-23
Supplement: bcj201241x7.pdf [file bcj201241x7.pdf]

**Supplemental table 4. Supervised analysis comparing sPCL versus MM samples.**

| <b>snoRNA</b> | <b>alias</b> | <b>cytoband</b> | <b>Score(d)</b> | <b>Fold Change</b> |
|---------------|--------------|-----------------|-----------------|--------------------|
| SNORD94       | U94          | 2p11            | -6.11           | 0.25               |
| SNORA60       | ACA60        | 20q11           | -5.04           | 0.50               |
| SNORD68       | HBII-202     | 16q24           | -5.02           | 0.41               |
| SNORA42       | ACA42        | 1q22            | -4.82           | 0.29               |
| SNORA49       | ACA49        | 12q24           | -4.76           | 0.41               |
| SNORA20       | ACA20        | 6p25            | -4.69           | 0.37               |
| SNORD55       | U55          | 1p34            | -4.61           | 0.50               |
| SNORA48       | ACA48        | 17p13           | -4.54           | 0.47               |
| SNORD95       | U95          | 5q35            | -4.29           | 0.50               |
| SNORD61       | U61          | Xq26            | -4.21           | 0.35               |
| SNORD32A      | U32A         | 19q13           | -4.04           | 0.47               |
