# Supplementary material for: The expression pattern of small nucleolar and small Cajal body-specific RNAs characterizes distinct molecular subtypes of multiple myeloma
Source: PubMed Central journal article supplement — Blood Cancer J. 2012 Nov 23;2(11):e96–. doi: 10.1038/bcj.2012.41 (PMC3511933; doi:10.1038/bcj.2012.41), 2012-11-23
Supplement: bcj201241x8.pdf [file bcj201241x8.pdf]

**Supplemental Table 5: Correlation of sno/scaRNA and host gene expression profiles**

| sno/scaRNA | HOST GENE | q -value | sno/scaRNA  | HOST GENE    | q -value |
|------------|-----------|----------|-------------|--------------|----------|
| SNORA44    | SNHG12    | 3.6E-13  | SNORA31     | TPT1         | 4.0E-04  |
| SNORA70F   | COBLL1    | 3.6E-13  | SNORD95     | GNB2L1       | 4.2E-04  |
| SNORA40    | TAF1D     | 4.3E-13  | SNORD15A    | RPS3         | 4.8E-04  |
| SNORD5     | TAF1D     | 6.8E-12  | SNORD63     | HSPA9        | 5.7E-04  |
| SNORA2B    | C12orf41  | 9.8E-12  | SNORD52     | C6orf48      | 9.1E-04  |
| SNORA8     | TAF1D     | 2.8E-11  | SCARNA1     | PPP1R8       | 1.1E-03  |
| SNORA70D   | PHLPP2    | 3.0E-11  | SNORA14B    | TOMM20       | 1.2E-03  |
| SNORA28    | EIF5      | 6.1E-11  | SNORA50     | CNOT1        | 1.2E-03  |
| SNORA16A   | SNHG12    | 3.2E-10  | SNORD101    | RPS12        | 1.4E-03  |
| SNORA1     | TAF1D     | 6.0E-10  | SNORA30     | SRCAP        | 1.7E-03  |
| SNORD45A   | RABGGTB   | 7.8E-10  | SNORD48     | C6orf48      | 1.7E-03  |
| SCARNA22   | WHSC1     | 1.3E-09  | SCARNA12    | PHB2         | 2.2E-03  |
| SNORA61    | SNHG12    | 2.0E-09  | SNORD37     | EEF2         | 4.3E-03  |
| SNORD45B   | RABGGTB   | 1.5E-08  | SNORD115-3  | SNRPN        | 7.5E-03  |
| SNORA70E   | RAB30     | 2.3E-08  | SNORD96A    | GNB2L1       | 8.4E-03  |
| SNORD6     | TAF1D     | 2.5E-08  | SCARNA5     | ATG16L1      | 9.1E-03  |
| SNORA16B   | PPP2R5A   | 2.7E-08  | SNORA23     | IPO7         | 9.6E-03  |
| SNORD21    | RPL5      | 2.7E-08  | SNORA52     | RPLP2        | 1.1E-02  |
| SNORA75    | NCL       | 3.5E-08  | SNORA13     | EPB41L4A-AS1 | 1.3E-02  |
| SNORD56    | NOP56     | 3.5E-08  | SNORA58     | MRPL3        | 1.6E-02  |
| SNORD20    | NCL       | 3.5E-07  | SNORA7B     | RPL32P3      | 1.7E-02  |
| SNORA45    | RPL27A    | 4.1E-07  | SNORD57     | NOP56        | 1.8E-02  |
| SNORD58A   | RPL17     | 6.9E-07  | SNORA29     | TCP1         | 2.1E-02  |
| SNORA4     | EIF4A2    | 7.4E-07  | SNORA5C     | TBRG4        | 2.6E-02  |
| SNORA6     | RPSA      | 1.1E-06  | SNORA41     | EEF1B2       | 2.7E-02  |
| SNORD82    | NCL       | 3.0E-06  | SNORD115-34 | SNRPN        | 2.7E-02  |
| SNORD15B   | RPS3      | 3.7E-06  | SNORD54     | RPS20        | 2.8E-02  |
| SNORA2A    | C12orf41  | 7.5E-06  | SNORD36C    | RPL7A        | 2.9E-02  |
| SNORD45C   | RABGGTB   | 7.5E-06  | SNORA70     | RPL10        | 3.2E-02  |
| SNORA56    | DKC1      | 8.5E-06  | SNORA71B    | LOC388796    | 3.4E-02  |
| SNORA66    | RPL5      | 9.6E-06  |             |              |          |
| SNORA37    | MBD2      | 1.3E-05  |             |              |          |
| SNORA55    | PABPC4    | 1.8E-05  |             |              |          |
| SNORD41    | TNPO2     | 2.1E-05  |             |              |          |
| SNORA5A    | TBRG4     | 4.7E-05  |             |              |          |
| SNORA71C   | LOC388796 | 5.5E-05  |             |              |          |
| SNORA54    | NAP1L4    | 5.8E-05  |             |              |          |
| SNORA46    | CNOT1     | 6.5E-05  |             |              |          |
| SNORD12C   | ZNF1-AS1  | 6.5E-05  |             |              |          |
| SNORA19    | EIF3A     | 7.0E-05  |             |              |          |
| SCARNA9    | KIAA1731  | 8.2E-05  |             |              |          |
| SNORA21    | RPL23     | 1.0E-04  |             |              |          |
| SNORD53    | WDR43     | 1.1E-04  |             |              |          |
| SCARNA8    | HAUS6     | 1.3E-04  |             |              |          |
| SNORA3     | RPL27A    | 2.2E-04  |             |              |          |
| SNORA70B   | USP34     | 3.1E-04  |             |              |          |
| SNORA71A   | LOC388796 | 3.3E-04  |             |              |          |
| SNORA33    | RPS12     | 3.4E-04  |             |              |          |
| SCARNA23   | POLA1     | 3.7E-04  |             |              |          |
