# Supplementary figures and images for: The expression pattern of small nucleolar and small Cajal body-specific RNAs characterizes distinct molecular subtypes of multiple myeloma
Source: PubMed Central journal article supplement — Blood Cancer J. 2012 Nov 23;2(11):e96–. doi: 10.1038/bcj.2012.41 (PMC3511933; doi:10.1038/bcj.2012.41), 2012-11-23

# Supplemental Figure 1.

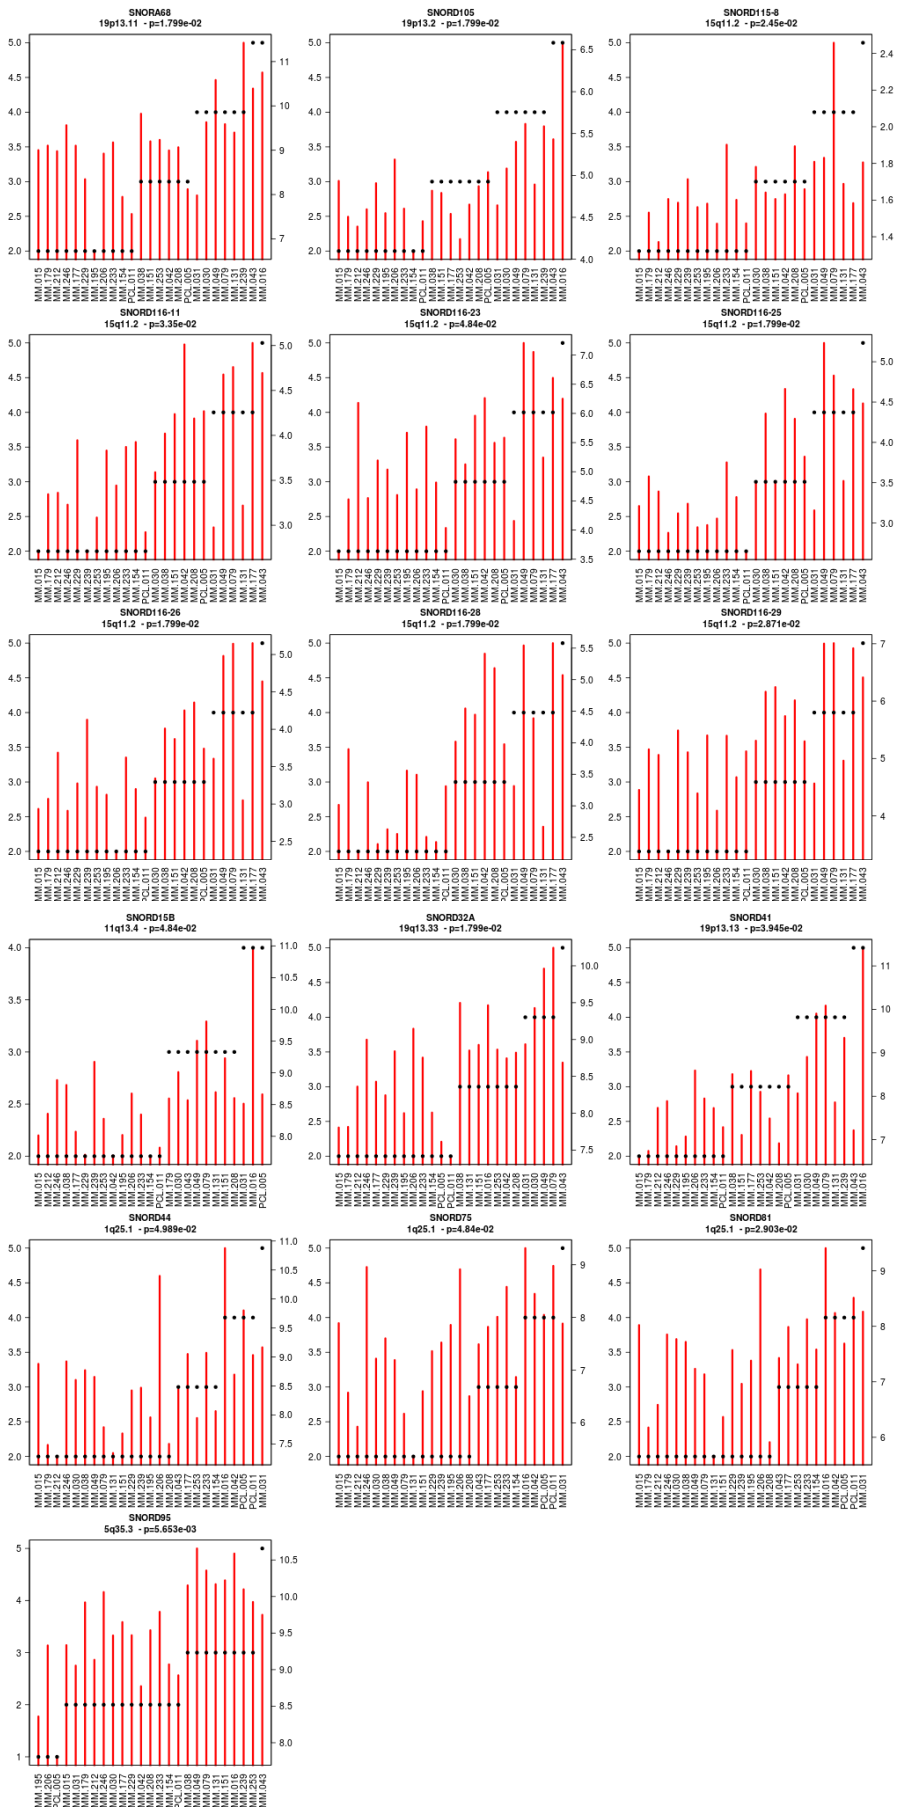

Supplement: bcj201241x1.pdf [file bcj201241x1.pdf]

## Supplemental Figure 2.

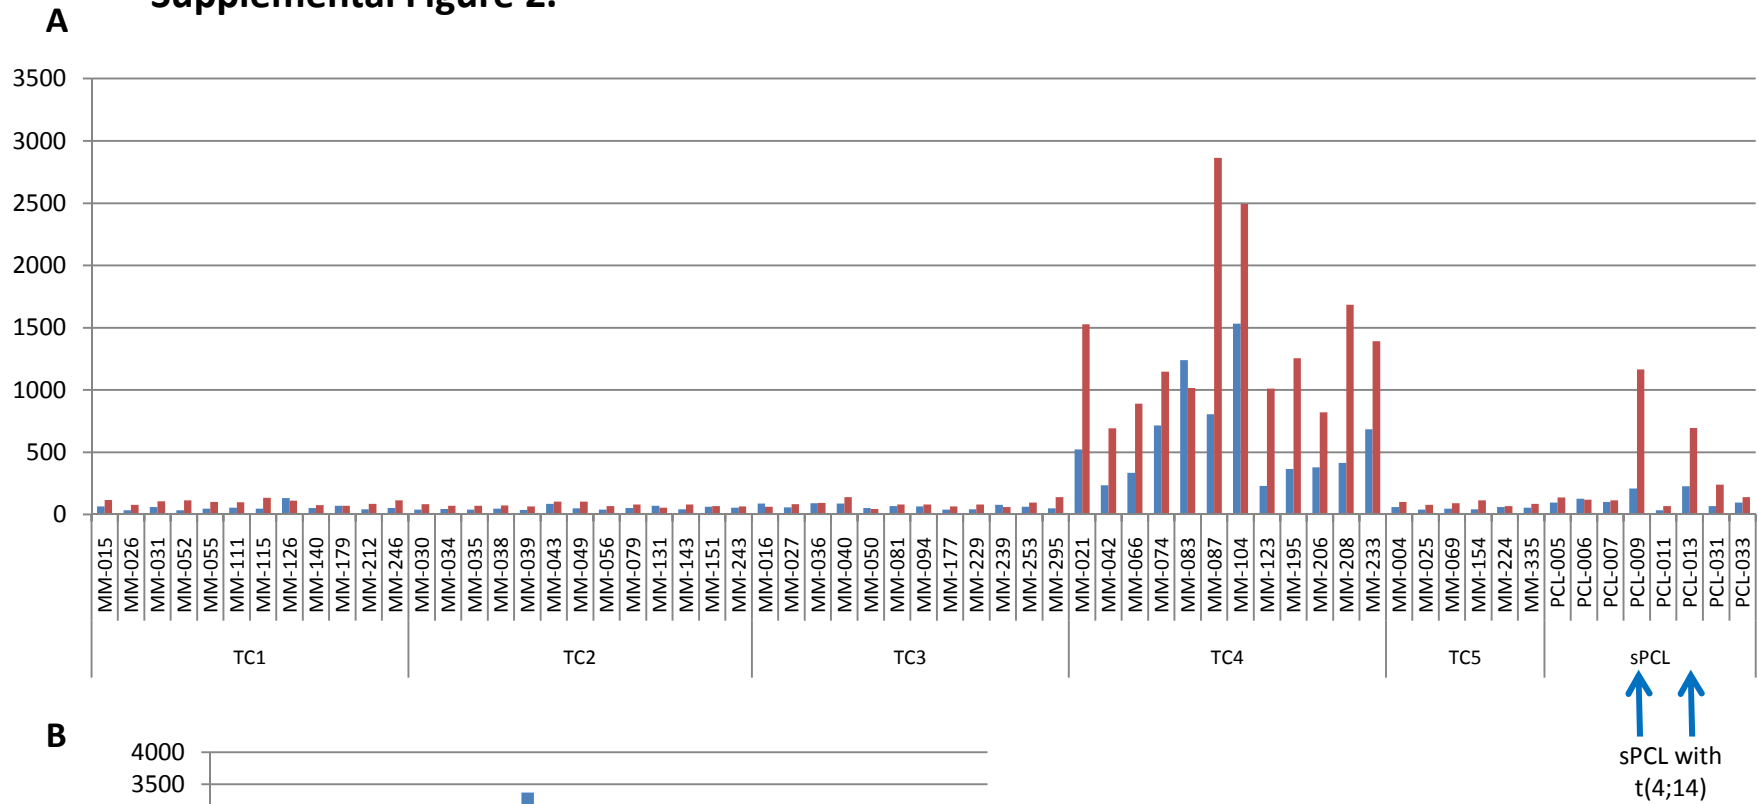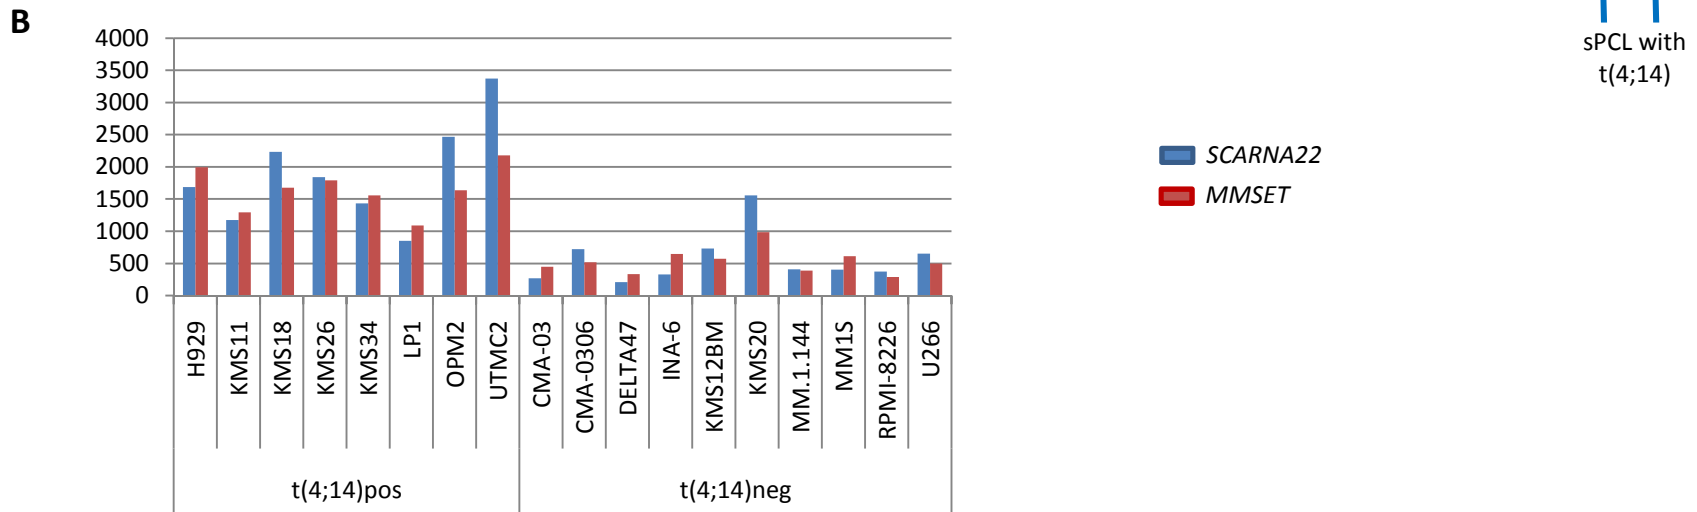

Supplement: bcj201241x2.pdf [file bcj201241x2.pdf]
